# Supplementary material for: A New Cyclic Hexapeptide and a New Isocoumarin Derivative from the Marine Sponge-Associated Fungus Aspergillus similanensis KUFA 0013
Source: Mar Drugs. 2015 Mar 17;13(3):1432–50. doi: 10.3390/md13031432 (PMC4377992; doi:10.3390/md13031432)
Supplement: Supplementary File 1 [file marinedrugs-13-01432-s001.pdf]

## Supplementary Information

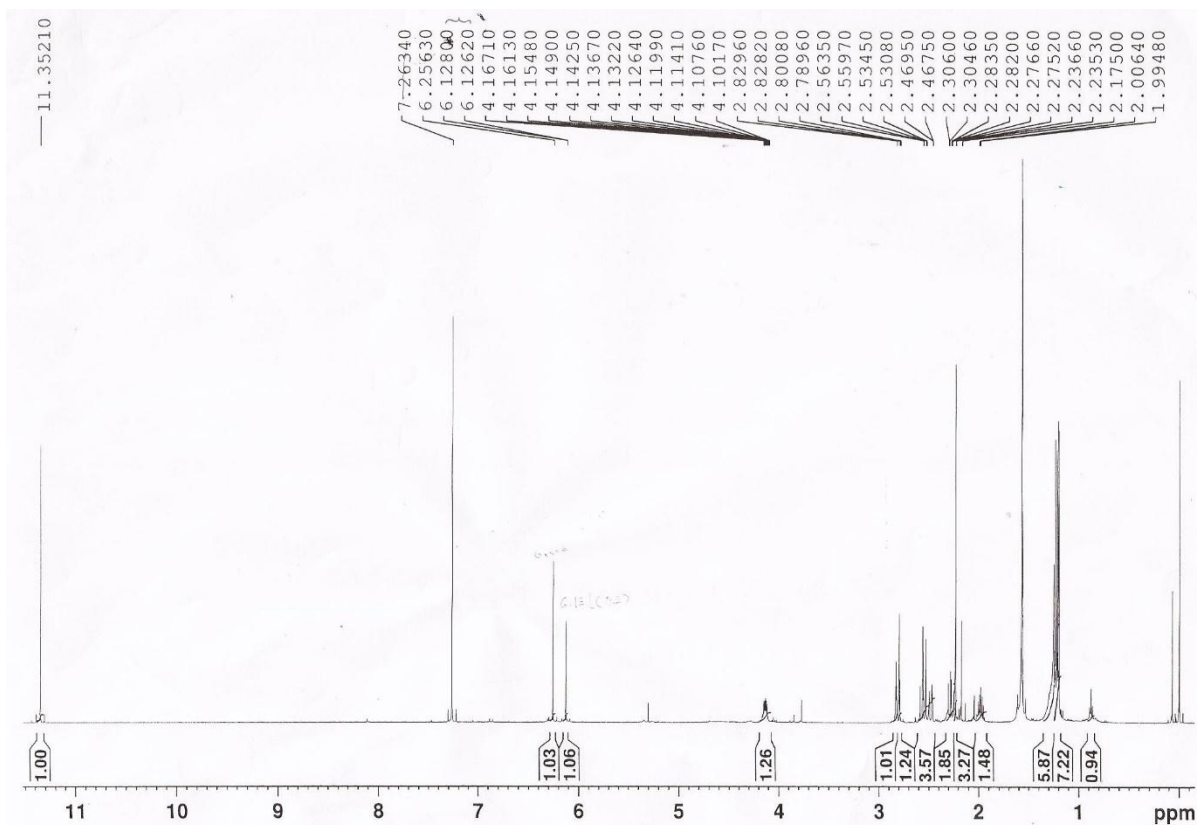

**Figure S1.**  $^1\text{H}$  NMR spectrum of compound **1** ( $\text{CDCl}_3$ , 500.13 MHz).

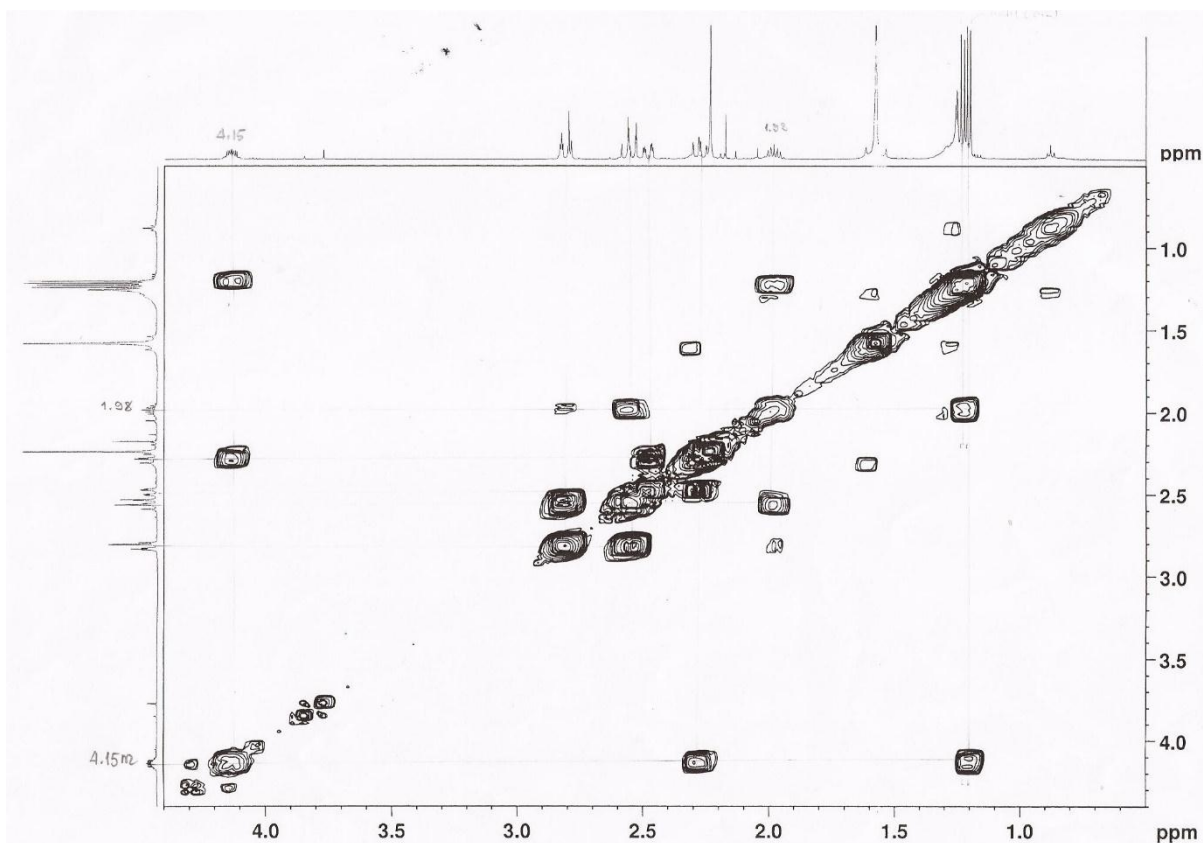

**Figure S2.** COSY spectrum of compound **1** ( $\text{CDCl}_3$ , 500.13 MHz).

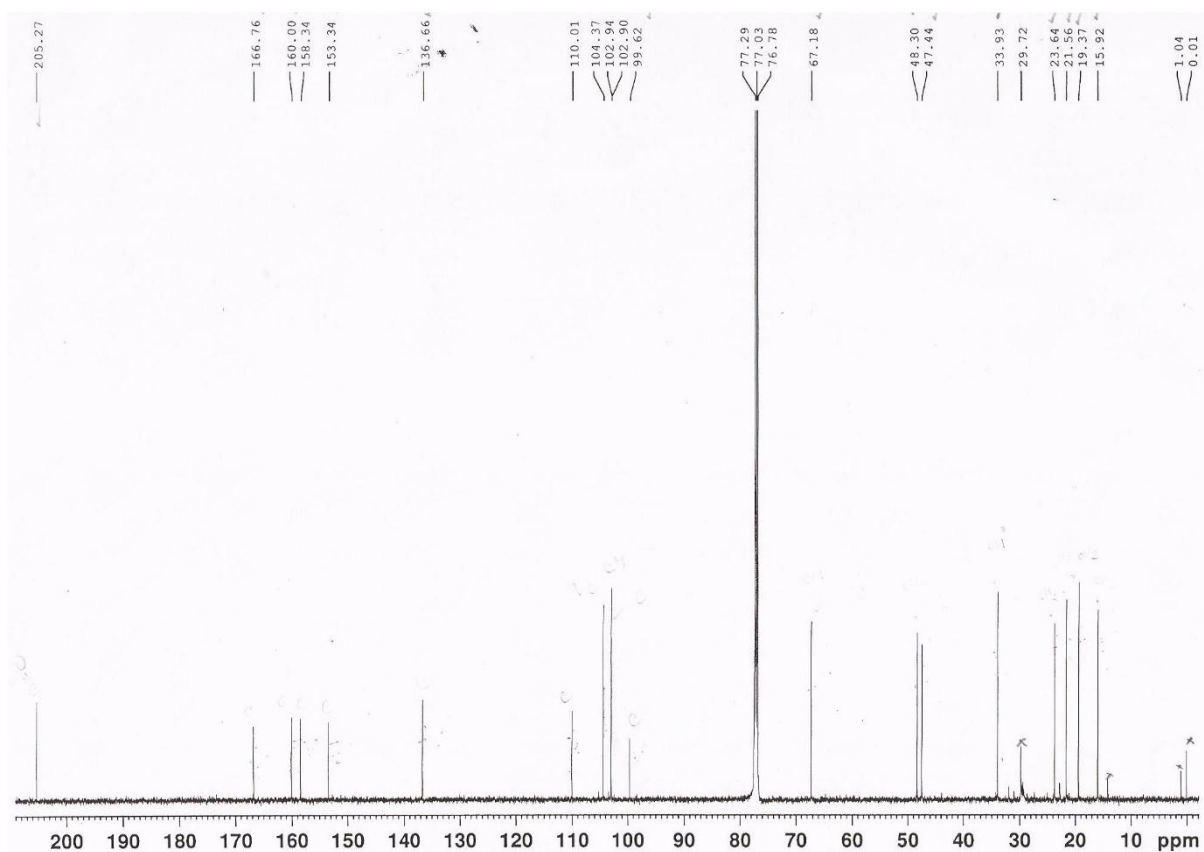

**Figure S3.**  $^{13}\text{C}$  NMR spectrum of compound **1** ( $\text{CDCl}_3$ , 125.8 MHz).

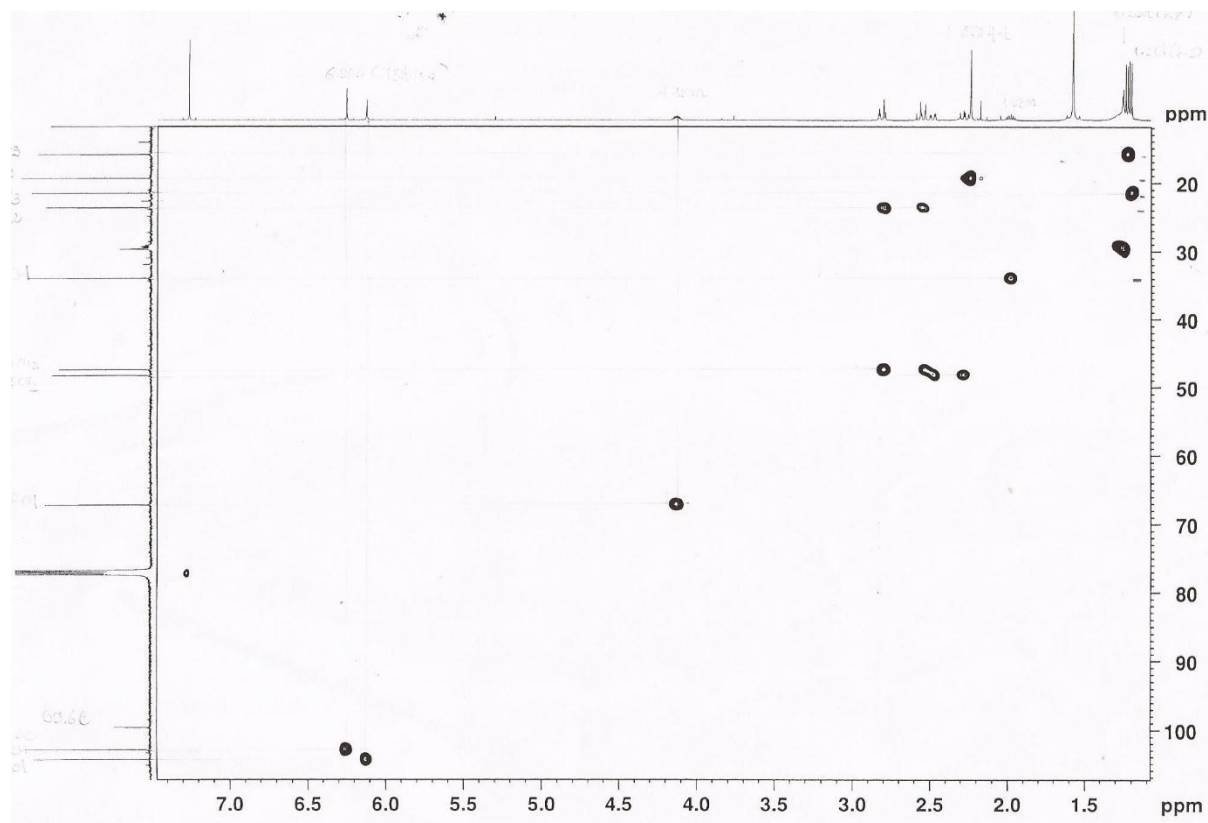

**Figure S4.** HSQC spectrum of compound **1** ( $\text{CDCl}_3$ , 500.13 MHz).

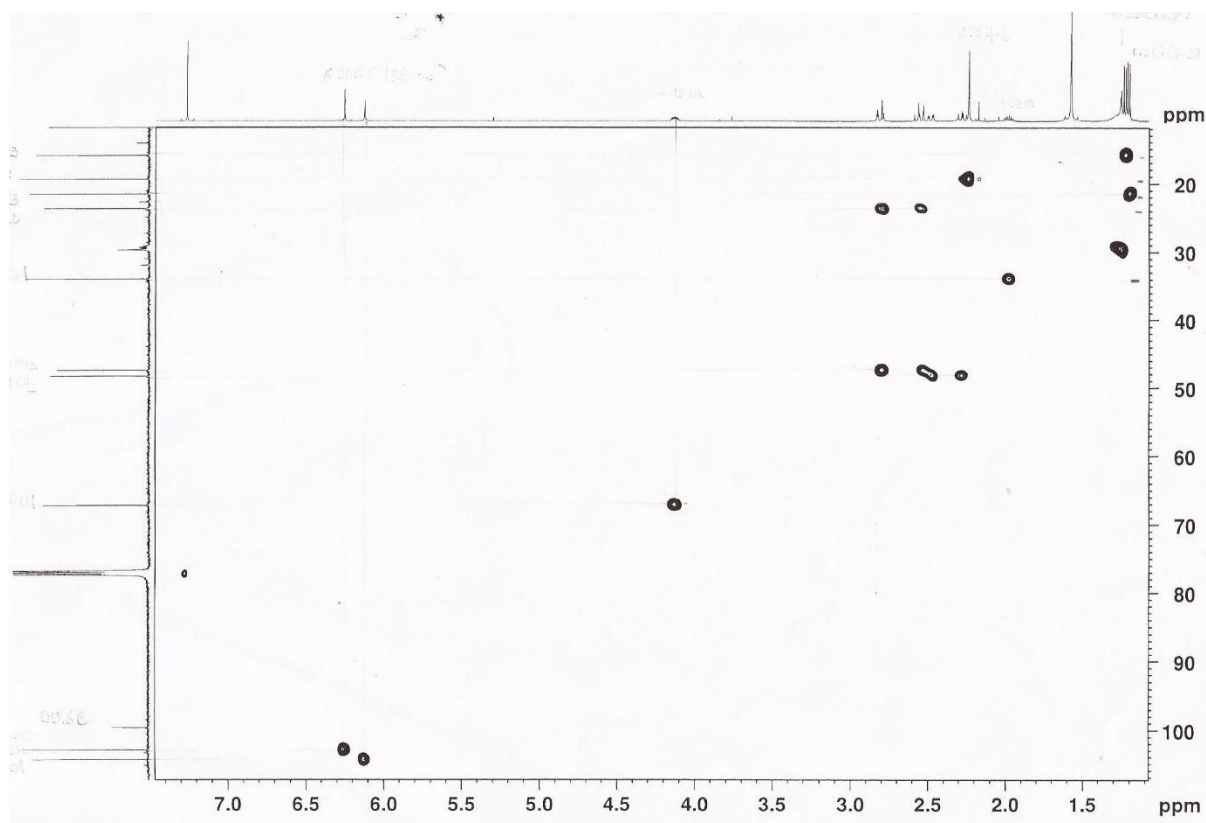

**Figure S5.** HMBC spectrum of compound **1** (CDCl<sub>3</sub>, 500.13 MHz).

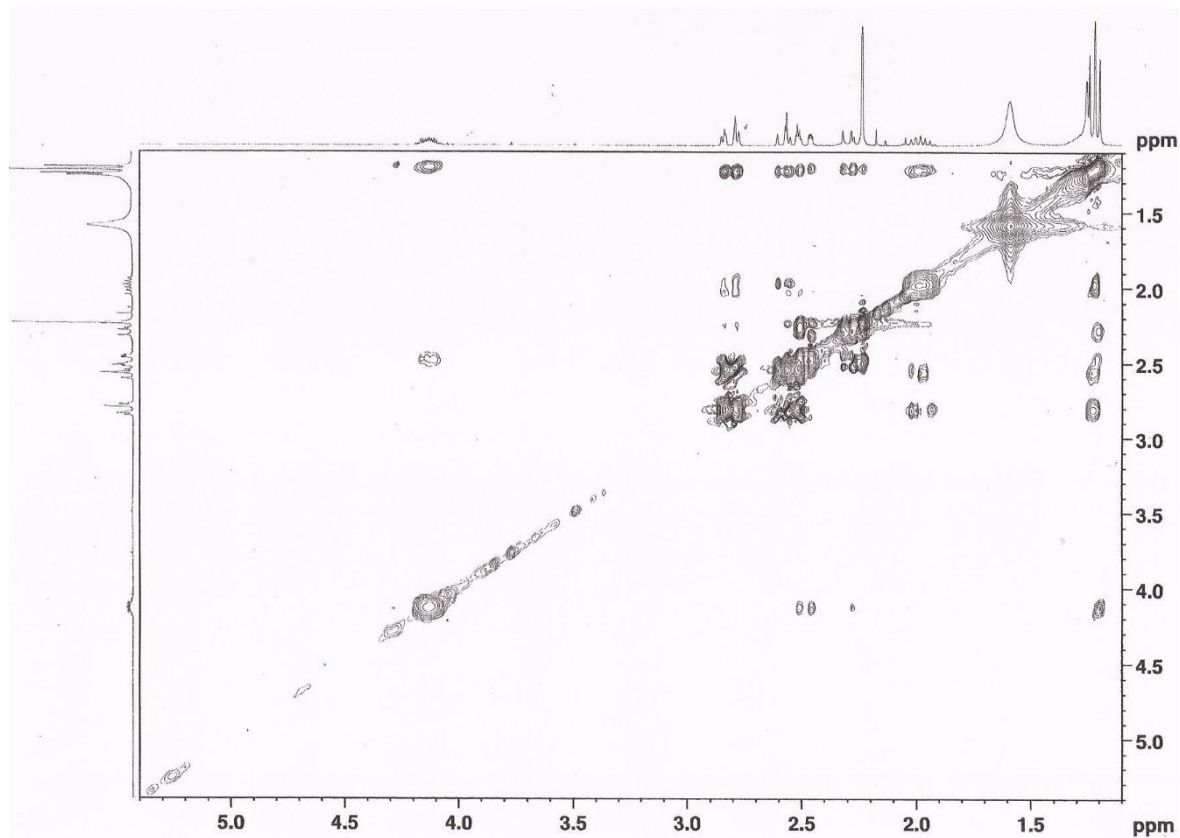

**Figure S6.** NOESY spectrum of compound **1** (CDCl<sub>3</sub>, 500.13 MHz).

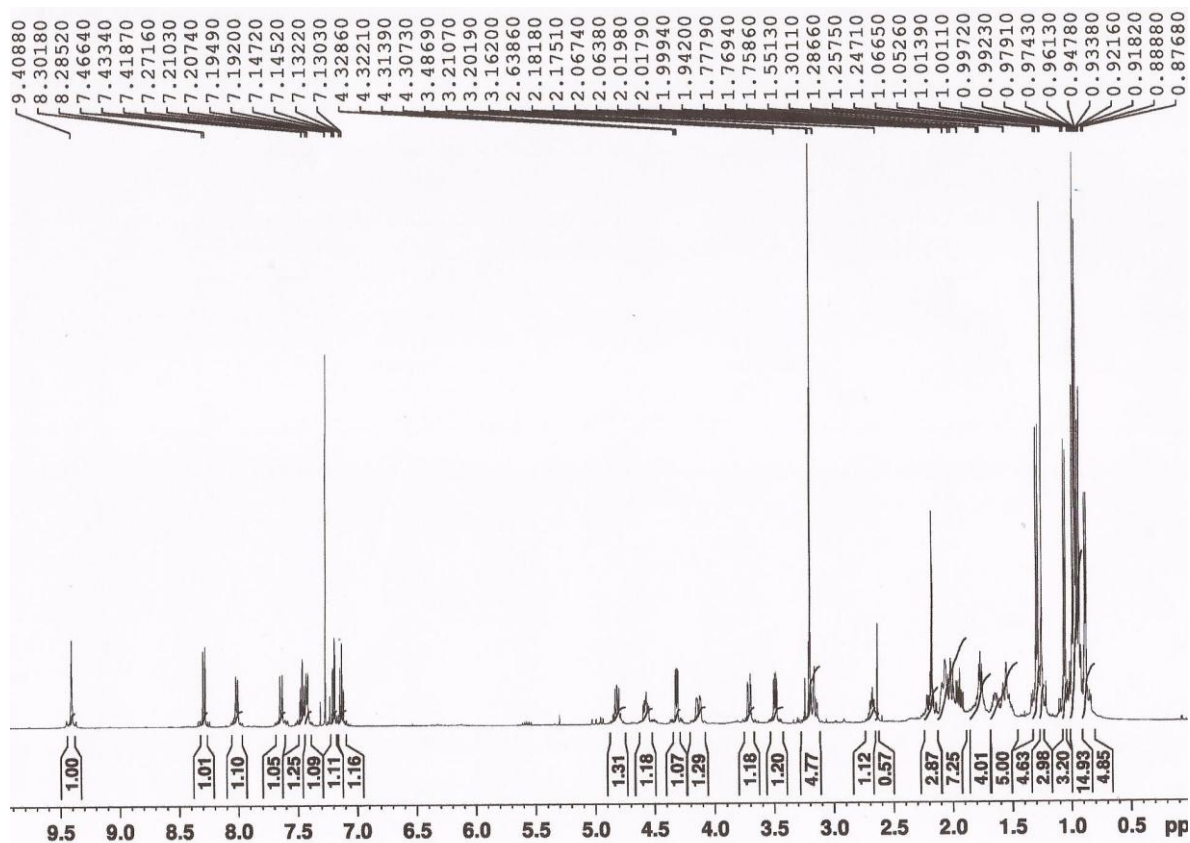

Figure S7. <sup>1</sup>H NMR spectrum of compound **2** (CDCl<sub>3</sub>, 500.13 MHz).

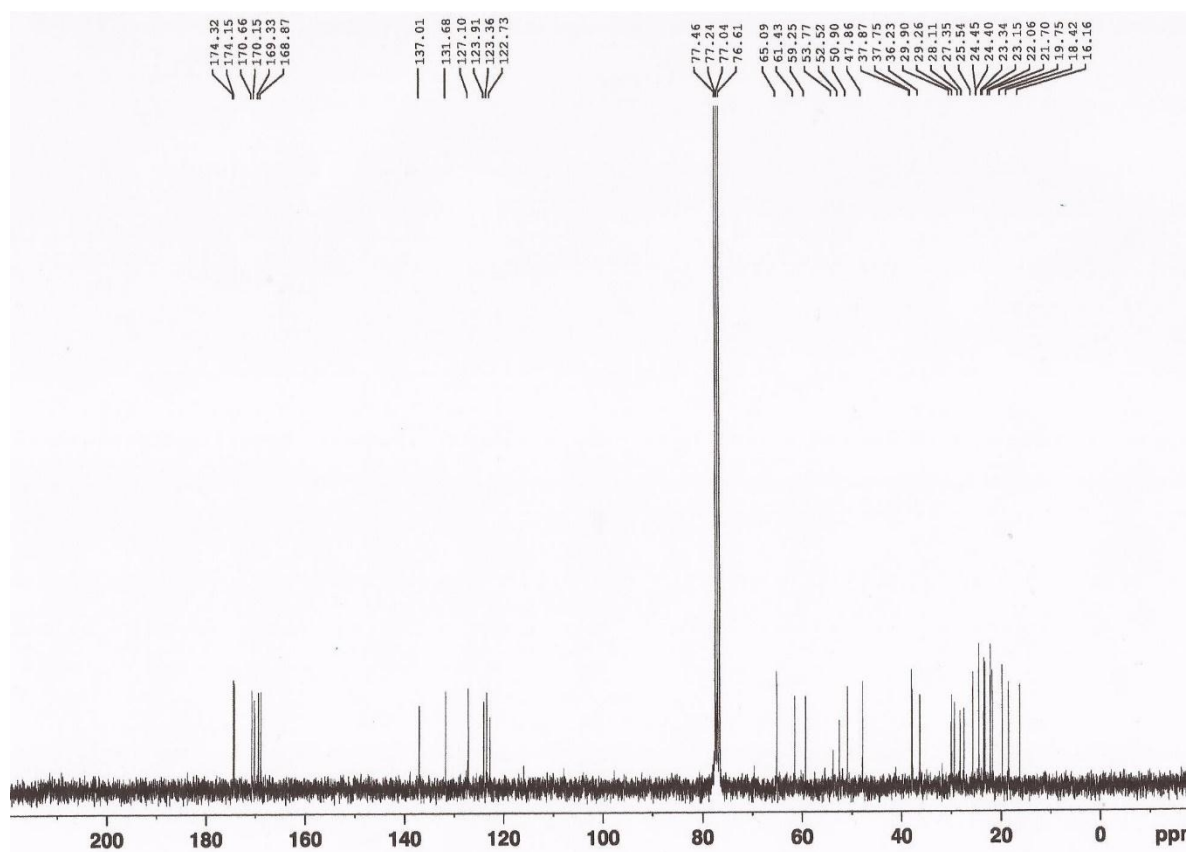

Figure S8. <sup>13</sup>C NMR spectrum of compound **2** (CDCl<sub>3</sub>, 125.8 MHz).

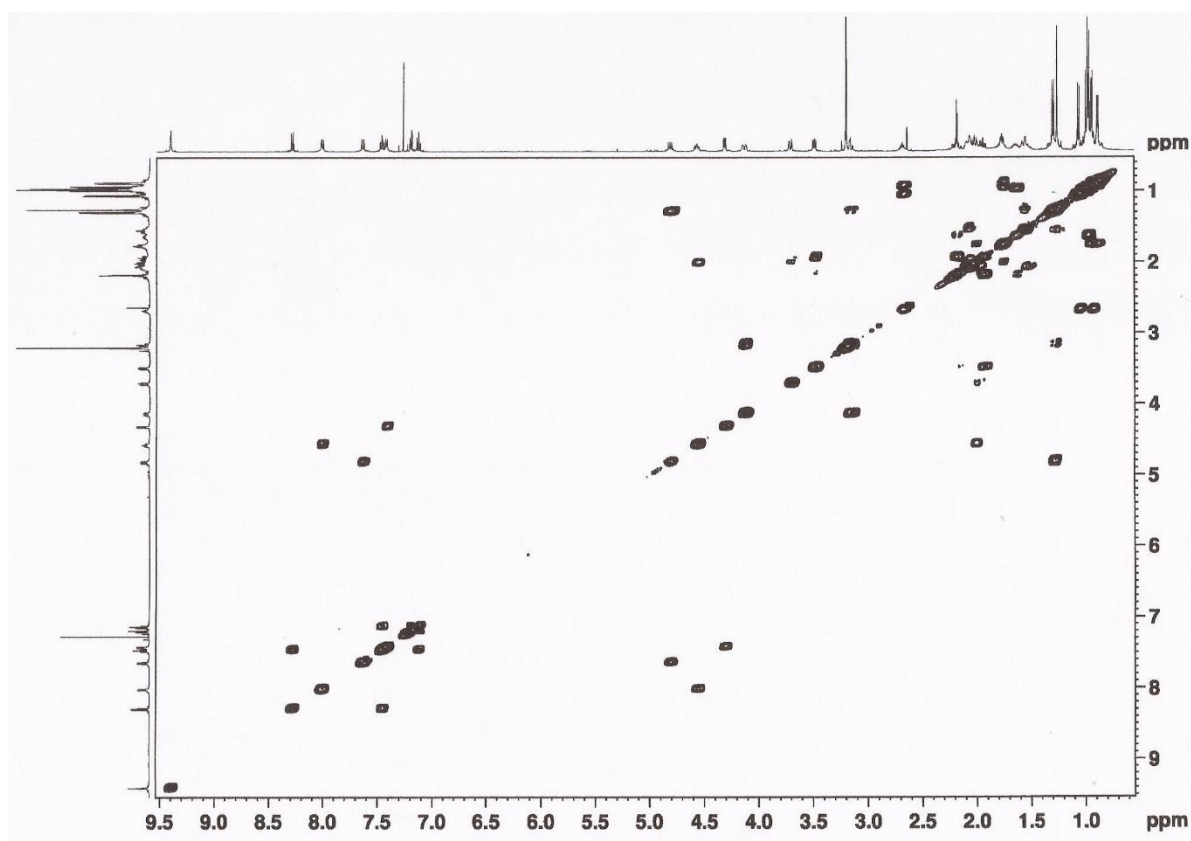

**Figure S9.** COSY spectrum of compound **2** (CDCl<sub>3</sub>, 500.13 MHz).

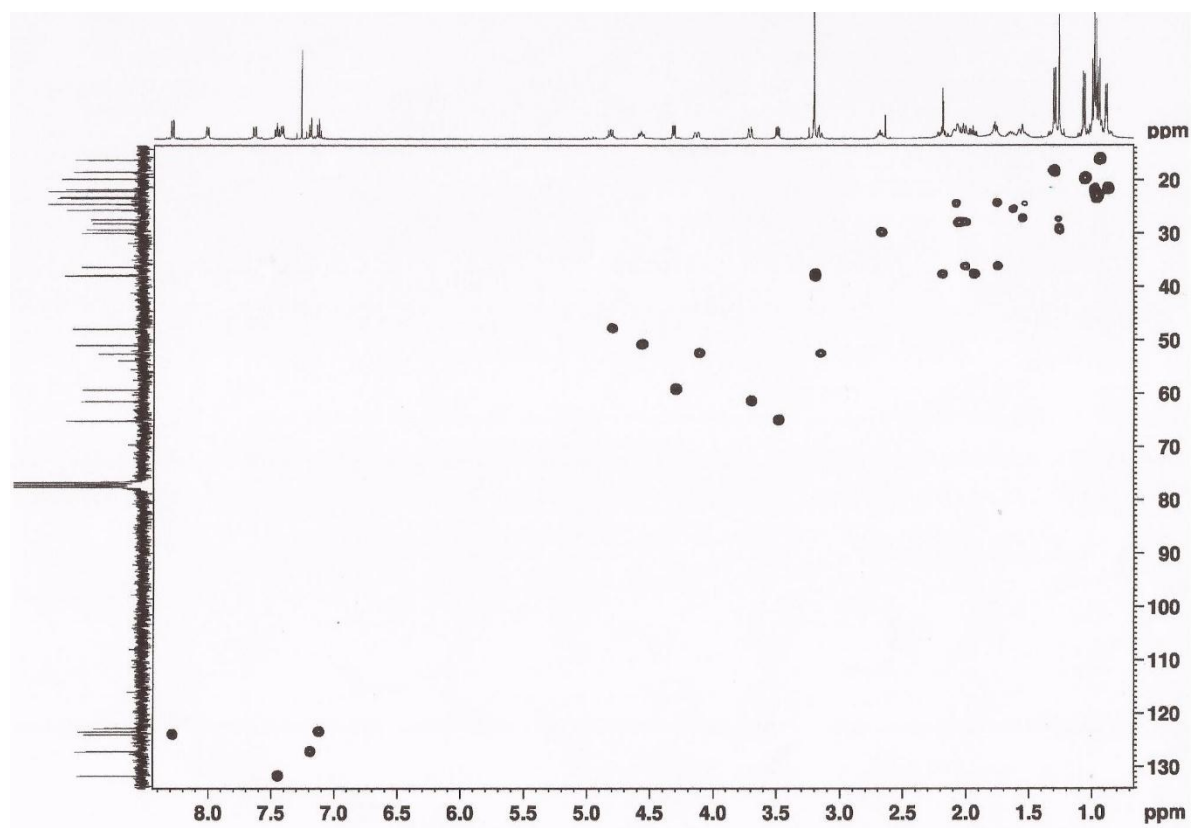

**Figure S10.** HSQC spectrum of compound **2** (CDCl<sub>3</sub>, 500.13 MHz).

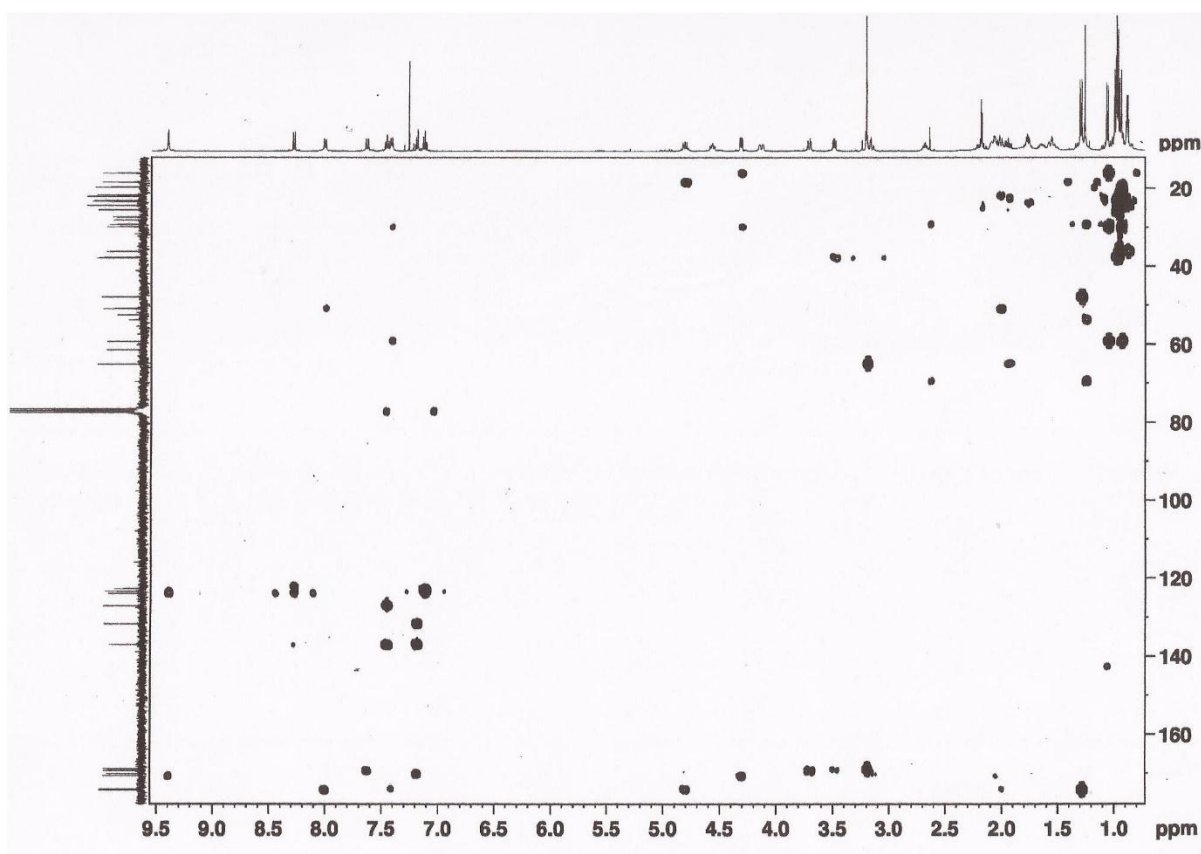

**Figure S11.** HMBC spectrum of compound **2** (CDCl<sub>3</sub>, 500.13 MHz).

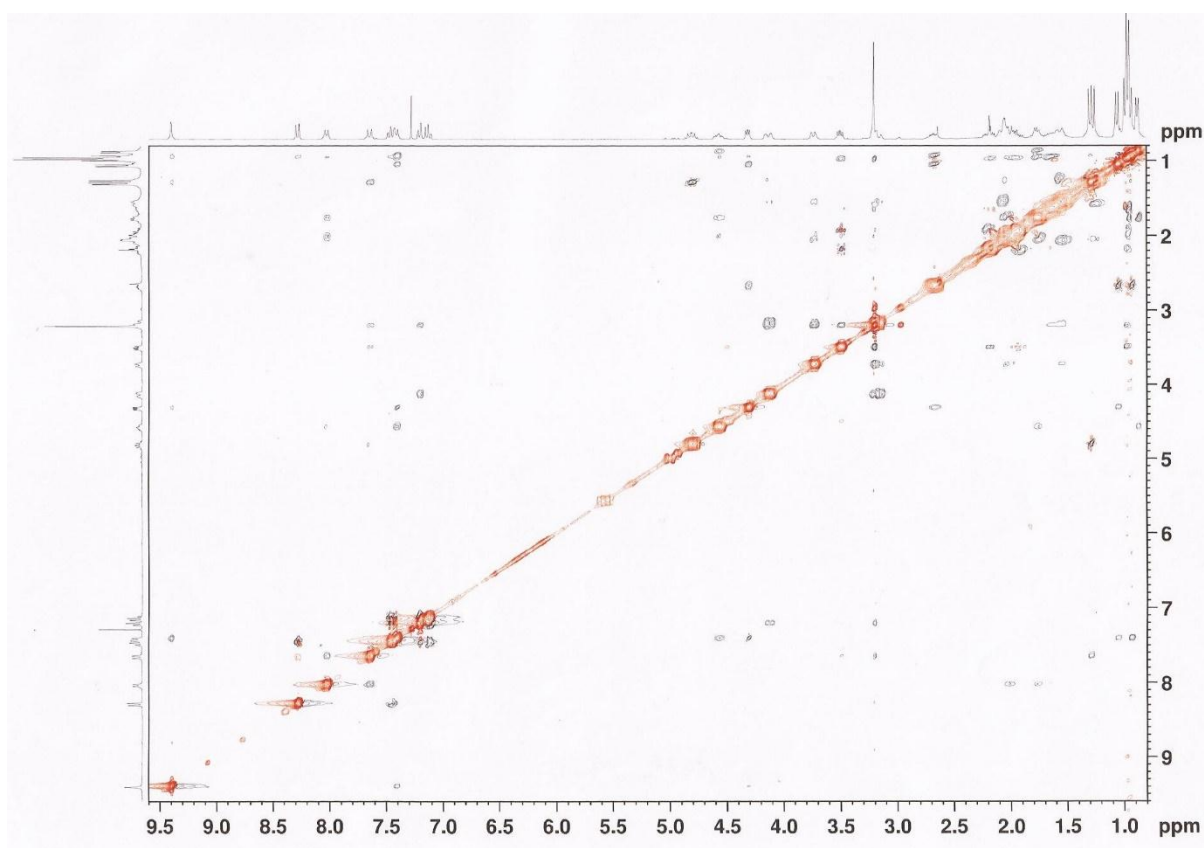

**Figure S12.** NOESY spectrum of compound **2** (CDCl<sub>3</sub>, 500.13 MHz).

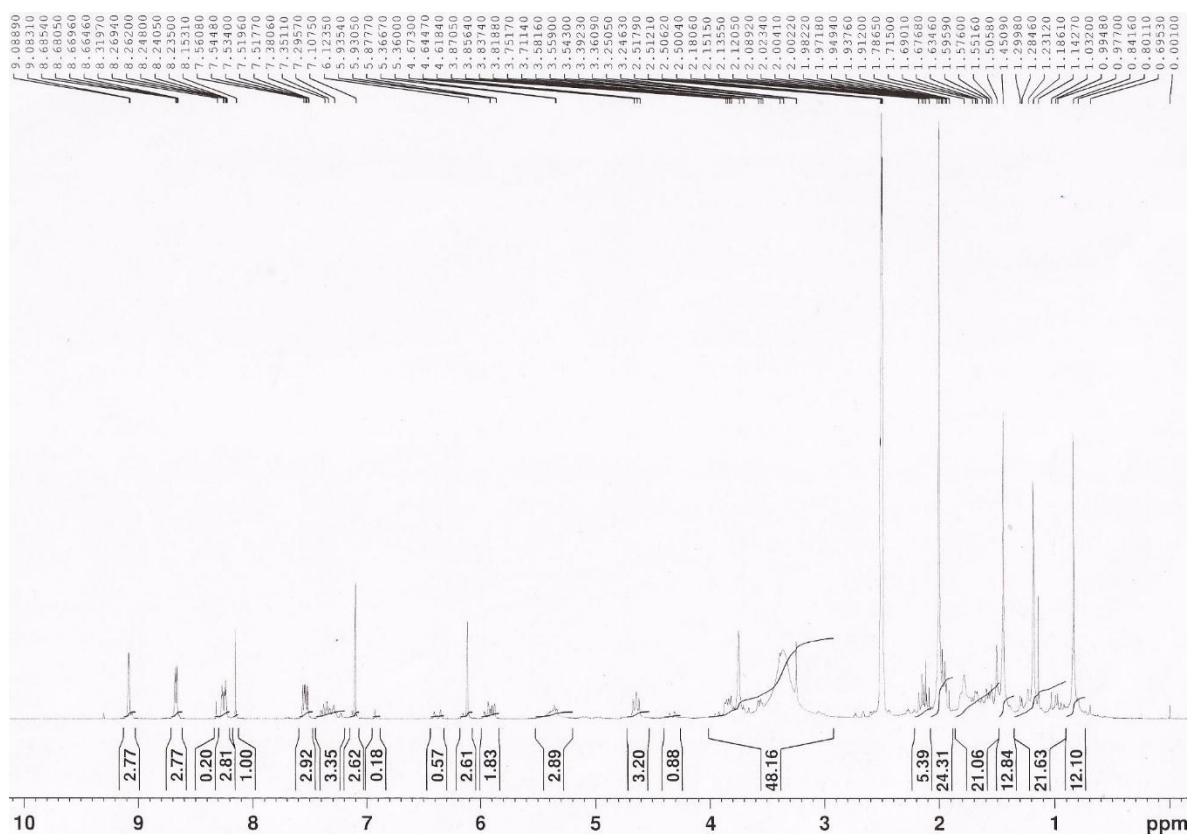

**Figure S13.** <sup>1</sup>H NMR spectrum of compound **3** (DMSO, 300.13 MHz).

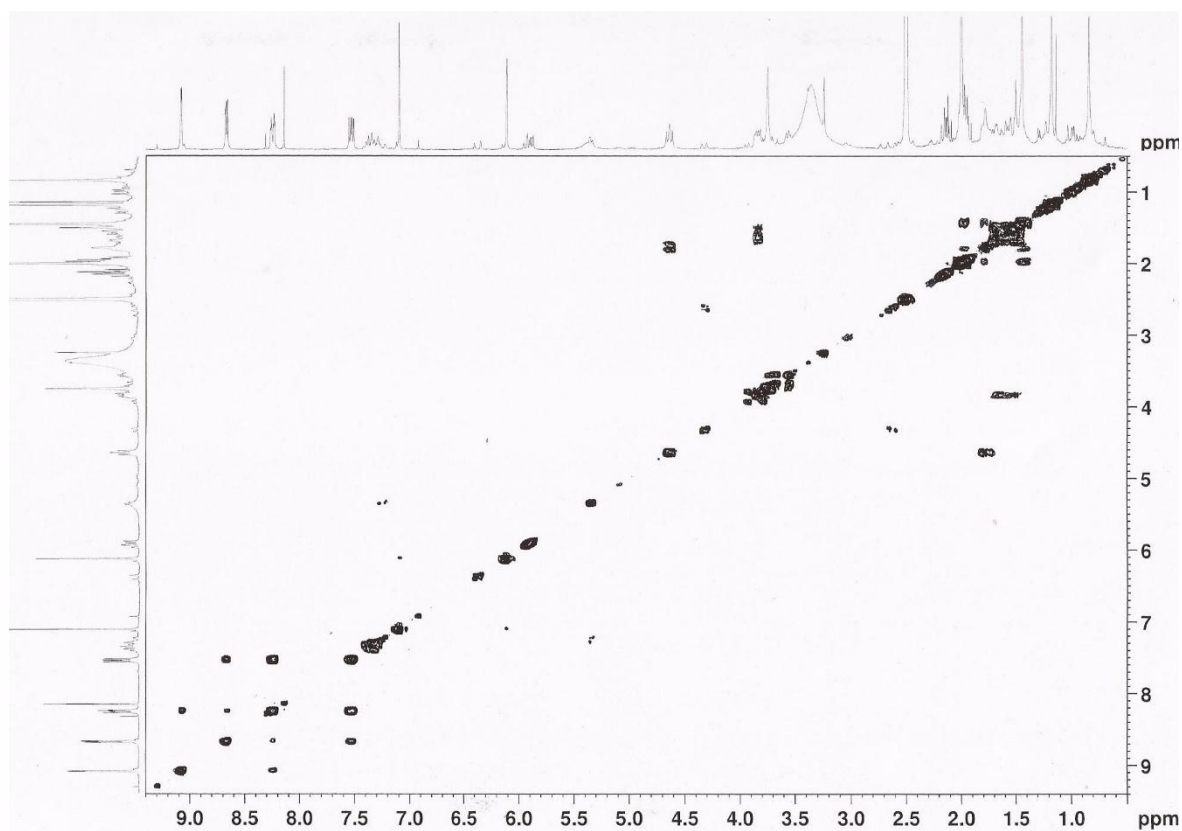

**Figure S14.** COSY spectrum of compound **3** (DMSO, 300.13 MHz).

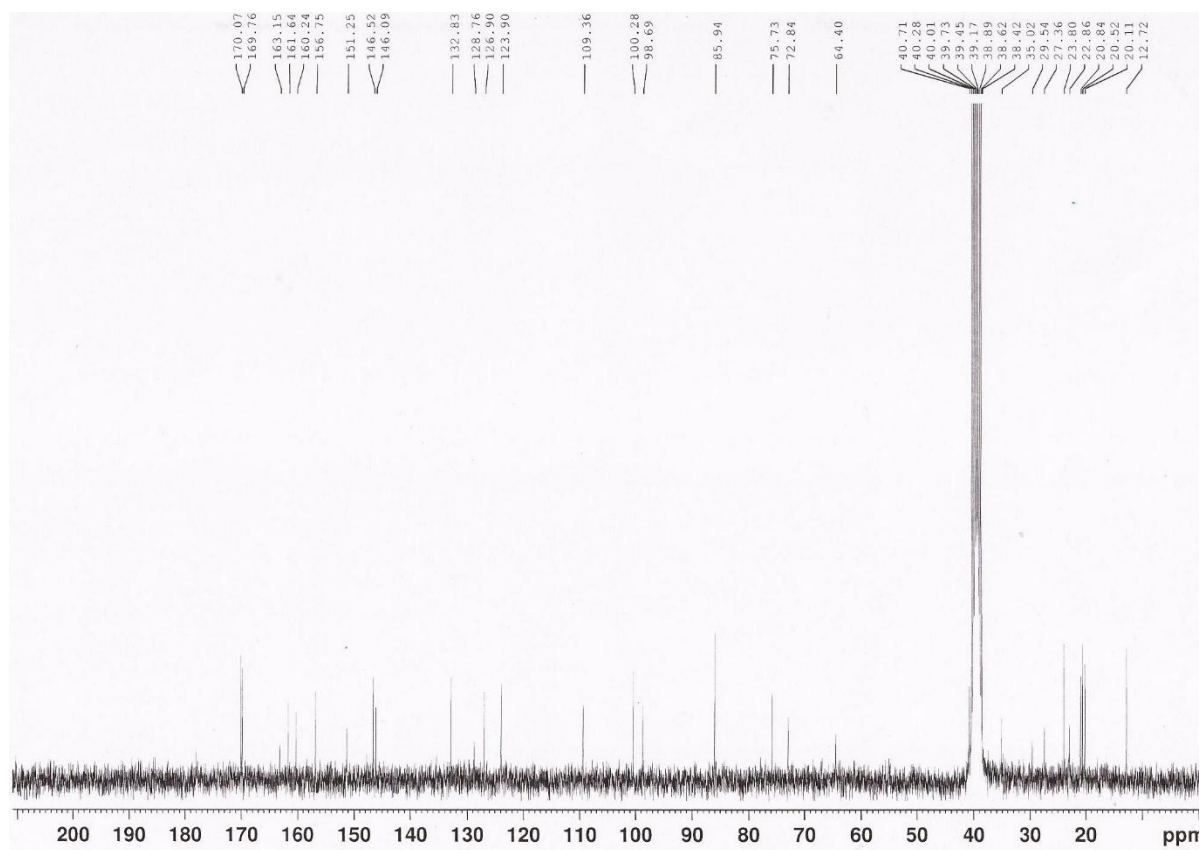

**Figure S15.**  $^{13}\text{C}$  NMR spectrum of compound **3** (DMSO, 75.47 MHz).

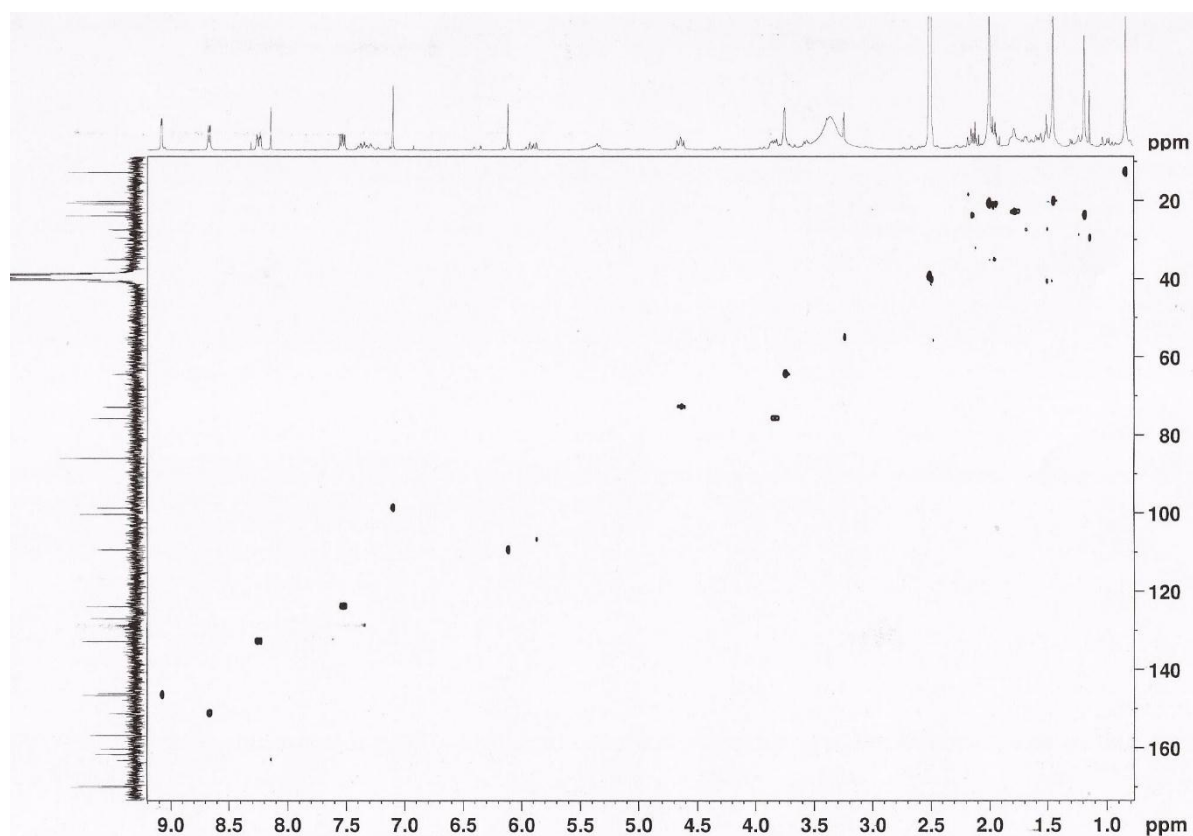

**Figure S16.** HSQC spectrum of compound **3** (DMSO, 300.13 MHz).

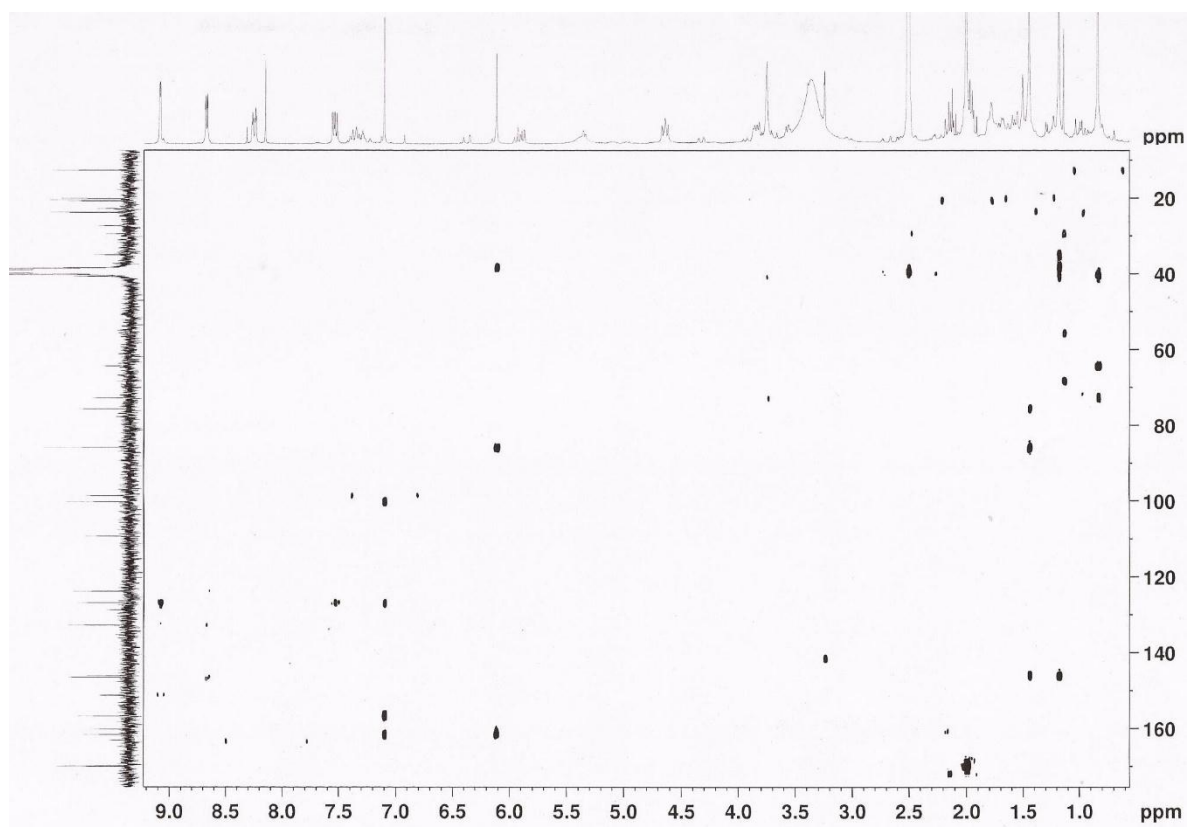

**Figure S17.** HMBC spectrum of compound **3** (DMSO, 300.13 MHz).

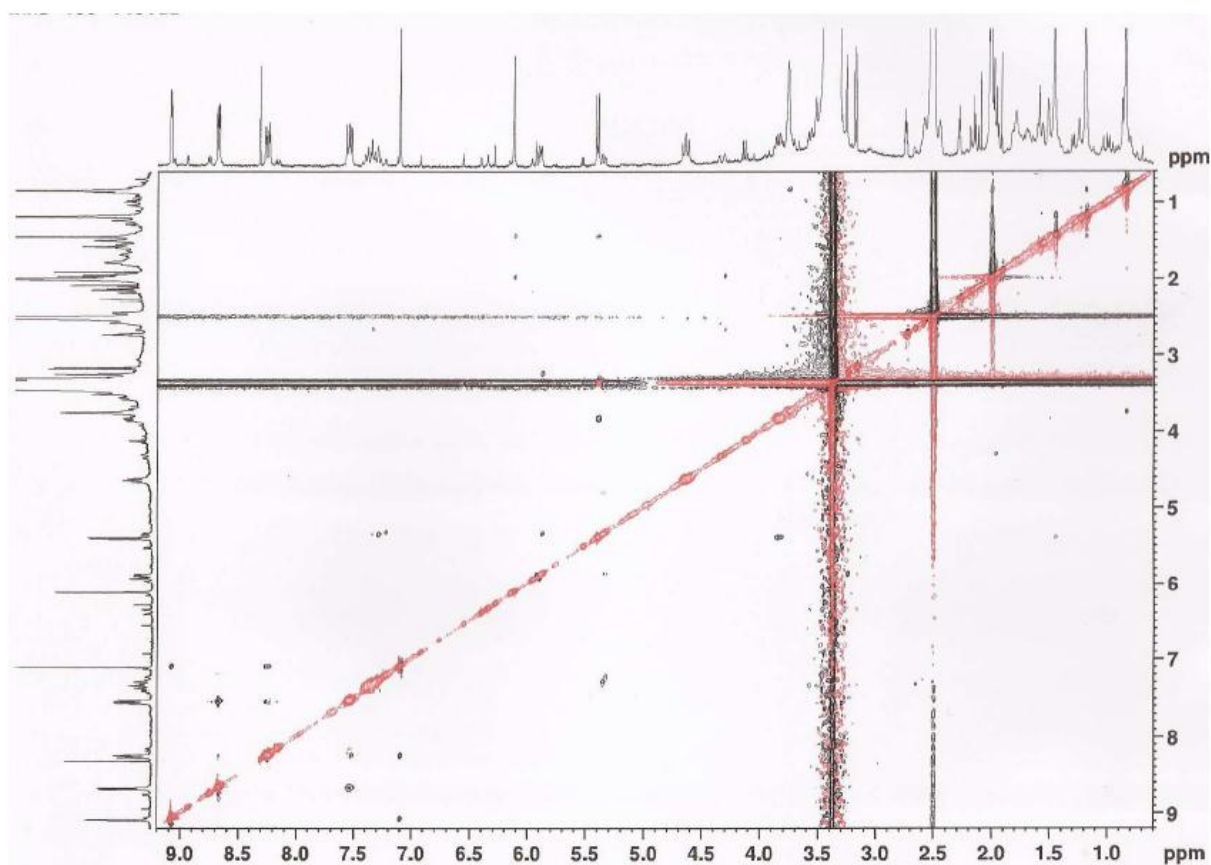

**Figure S18.** NOESY spectrum of compound **3** (DMSO, 300.13 MHz).

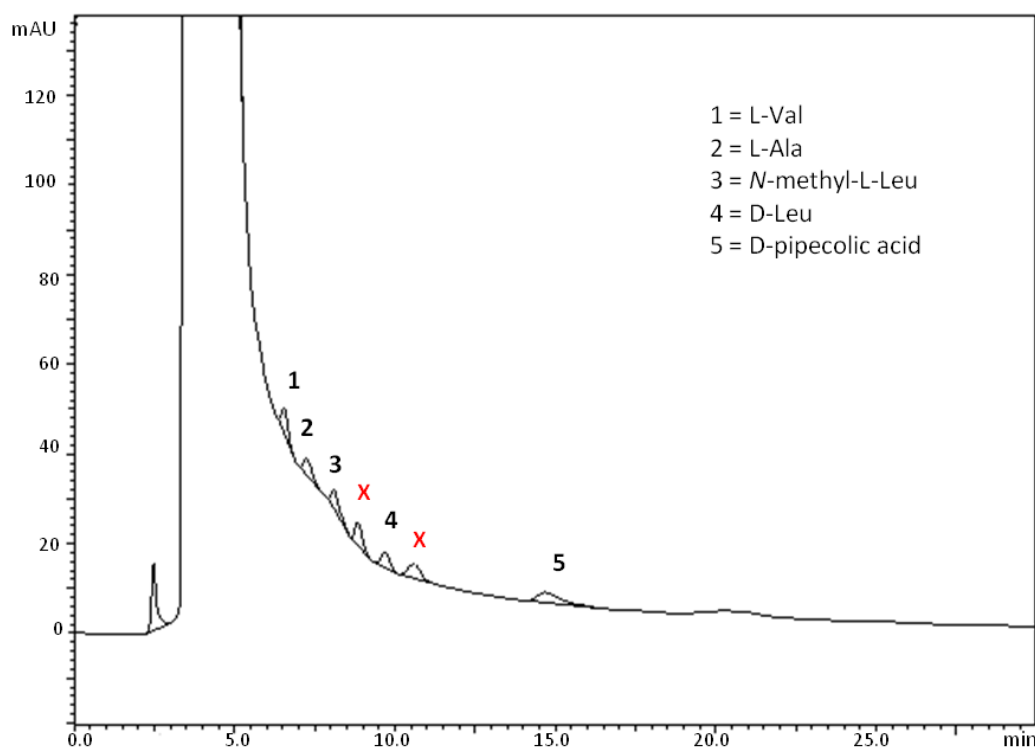

**Figure S19.** Chromatogram of the acidic hydrolysate of compound **2**. Chromatographic conditions: column, Chirobiotic T; mobile phase, MeOH:H<sub>2</sub>O:CH<sub>3</sub>CO<sub>2</sub>H (70:30:0.02 v/v/v); flow rate, 0.5 mL/min; detection, 210 nm.

**Table S1.** Chiral HPLC analysis of the acidic hydrolysate of compound **2** \*.

|                                                                   | Retain Time (min)                                |
|-------------------------------------------------------------------|--------------------------------------------------|
| L-valine                                                          | 6.60                                             |
| D-valine                                                          | 8.32                                             |
| L-alanine                                                         | 7.16                                             |
| D-alanine                                                         | 9.36                                             |
| L-leucine                                                         | 6.78                                             |
| D-leucine                                                         | 9.67                                             |
| L-pipecolic acid                                                  | 8.68                                             |
| D-pipecolic acid                                                  | 14.67                                            |
| N-methyl-L-leucine                                                | 8.09                                             |
| Acidic hydrolysate of <b>2</b>                                    | 6.59, 7.20, 8.09, 8.83, 9.67, 10.57, 14.69       |
| Acidic hydrolysate of <b>2</b> + DL-valine (coinjection)          | 6.61, 7.31, 8.30, 8.10, 8.84, 9.70, 10.50, 14.95 |
| Acidic hydrolysate of <b>2</b> + DL-alanine (coinjection)         | 6.59, 7.19, 8.04, 8.81, 9.37, 9.70, 10.50, 14.90 |
| Acidic hydrolysate of <b>2</b> + DL-leucine                       | 6.60, 6.76, 7.26, 8.04, 8.83, 9.67, 10.54, 15.02 |
| Acidic hydrolysate of <b>2</b> + DL-pipecolic acid (coinjection)  | 6.58, 7.20, 8.09, 8.64, 8.84, 9.77, 10.64, 14.64 |
| Acidic hydrolysate of <b>2</b> + N-methyl-L-leucine (coinjection) | 6.59, 7.20, 8.09, 8.83, 9.67, 10.57, 14.69       |

\* Chromatographic conditions: column, Chirobiotic T; mobile phase, methanol:water:acetic acid (70:30:0.02 v/v/v); flow rate, 0.5 mL/min; detection, 210 nm.
